# Supplementary material
Source: MDPI journal article supplement (https://www.mdpi.com/2079-9276/10/5/54)
Supplement: s1 [file s1]

**Table S1.** Chemistry of the Triassic aquifer in Wojkowice and the surrounding area (06.2016).

The tests were carried out in the certified Laboratory of SGS Poland, Environmental Laboratory, Pszczyna, Poland (ilac MRA; PCA Polish Center for Accreditation; AB 1232).

| Number of spring/<br>well               | 1/<br>„Stara<br>107”<br>spring | 2/<br>U Wnuka”<br>spring | 3/<br>„Brzeziny”<br>spring | 5/<br>„Długosza<br>36” spring | 6/<br>well<br>„Roztówka<br>R-1” | 7/<br>well<br>„Przelajka<br>– 3” |
|-----------------------------------------|--------------------------------|--------------------------|----------------------------|-------------------------------|---------------------------------|----------------------------------|
| Parameter                               |                                |                          |                            |                               |                                 |                                  |
| Temp. of water<br>[°C]                  | 13.0                           | 13.5                     | 10.1                       | 10.5                          | 10.5                            | 12.2                             |
| Calibration limit                       | ±2.0                           | ±2.1                     | ±1.6                       | ±1.6                          | ±1.6                            | ±1.9                             |
| pH<br>[-]                               | 8.3                            | 7.4                      | 6.5                        | 6.9                           | 7.1                             | 7.3                              |
| Calibration limit                       | ±0.3                           | ±0.3                     | ±0.3                       | ±0.3                          | ±0.3                            | ±0.3                             |
| O <sub>2</sub><br>[mg L <sup>-1</sup> ] | 10.3                           | 12.1                     | 7.5                        | 4.1                           | 7.2                             | 8.9                              |
| Calibration limit                       | ±0.5                           | ±0.5                     | ±0.5                       | ±0.5                          | ±0.5                            | ±0.5                             |
| EC<br>[μS cm <sup>-1</sup> ]            | 495                            | 480                      | 625                        | 1128                          | 976                             | 1030                             |
| Calibration limit                       | ±50                            | ±48                      | ±63                        | ±113                          | ±98                             | ±103                             |
| Cr<br>[μg L <sup>-1</sup> ]             | < 4.0                          | < 4.0                    | < 4.0                      | < 4.0                         | < 4.0                           | < 4.0                            |
| Calibration limit                       | –                              | –                        | –                          | –                             | –                               | –                                |
| Pb<br>[μg L <sup>-1</sup> ]             | 4.4                            | < 4.0                    | < 4.0                      | < 4.0                         | < 4.0                           | < 4.0                            |
| Calibration limit                       | ±0.5                           | –                        | –                          | –                             | –                               | –                                |
| Cd<br>[μg L <sup>-1</sup> ]             | < 0.30                         | < 0.30                   | < 0.30                     | < 0.30                        | 1.1                             | 0.9                              |
| Calibration limit                       | –                              | –                        | –                          | –                             | ±0.2                            | ±0.1                             |
| Cu<br>[mg L <sup>-1</sup> ]             | < 0.0020                       | < 0.0020                 | < 0.0020                   | < 0.0020                      | < 0.0020                        | 0.0020                           |
| Calibration limit                       | –                              | –                        | –                          | –                             | –                               | –                                |
| Zn<br>[mg L <sup>-1</sup> ]             | < 0.050                        | < 0.050                  | < 0.050                    | 0.054                         | 0.55                            | 0.90                             |
| Calibration limit                       | –                              | –                        | –                          | ±0.006                        | ±0.06                           | ±0.09                            |
| Hg<br>[μg L <sup>-1</sup> ]             | < 0.050                        | < 0.050                  | < 0.050                    | < 0.050                       | < 0.050                         | < 0.050                          |
| Calibration limit                       | –                              | –                        | –                          | –                             | –                               | –                                |
| Na<br>[mg L <sup>-1</sup> ]             | 5.00                           | 8.62                     | 18.3                       | 47.2                          | 33.5                            | 74.6                             |
| Calibration limit                       | ±0.50                          | ±0.87                    | ±1.9                       | ±4.8                          | ±3.4                            | ±7.5                             |
| Mg<br>[mg L <sup>-1</sup> ]             | 29.7                           | 31.2                     | 40.5                       | 50.3                          | 75.4                            | 60.7                             |
| Calibration limit                       | ±6.0                           | ±6.3                     | ±8.1                       | ±10.1                         | ±15.1                           | ±12.2                            |
| Al<br>[μg L <sup>-1</sup> ]             | < 10.0                         | < 10.0                   | < 10.0                     | < 10.0                        | < 10.0                          | < 10.0                           |
| Calibration limit                       | –                              | –                        | –                          | –                             | –                               | –                                |
| K<br>[mg L <sup>-1</sup> ]              | < 1.00                         | 1.80                     | 2.38                       | 4.55                          | 10.3                            | 4.96                             |
| Calibration limit                       | –                              | ±0.36                    | ±0.48                      | ±0.91                         | ±2.1                            | ±1.00                            |
| Ca<br>[mg L <sup>-1</sup> ]             | 104                            | 91.1                     | 120                        | 158                           | 153                             | 143                              |
| Calibration limit                       | ±21                            | ±18.3                    | ±24                        | ±32                           | ±31                             | ±29                              |
| Mn<br>[μg L <sup>-1</sup> ]             | < 4.0                          | < 4.0                    | < 4.0                      | < 4.0                         | < 4.0                           | < 4.0                            |
| Calibration limit                       | –                              | –                        | –                          | –                             | –                               | –                                |
| Fe<br>[μg L <sup>-1</sup> ]             | < 60.0                         | < 60.0                   | < 60.0                     | < 60.0                        | < 60.0                          | < 60.0                           |
| Calibration limit                       | –                              | –                        | –                          | –                             | –                               | –                                |
| Co<br>[mg L <sup>-1</sup> ]             | < 0.0050                       | < 0.0050                 | < 0.0050                   | < 0.0050                      | < 0.0050                        | < 0.0050                         |
| Calibration limit                       | –                              | –                        | –                          | –                             | –                               | –                                |

|                                                                                |               |                 |                  |                 |               |               |
|--------------------------------------------------------------------------------|---------------|-----------------|------------------|-----------------|---------------|---------------|
| Ni<br>[µg L <sup>-1</sup> ]<br>Calibration limit                               | < 5.0<br>—    | < 5.0<br>—      | < 5.0<br>—       | < 5.0<br>—      | < 5.0<br>—    | < 5.0<br>—    |
| As<br>[µg L <sup>-1</sup> ]<br>Calibration limit                               | < 1.0<br>—    | < 1.0<br>—      | < 1.0<br>—       | < 1.0<br>—      | < 1.0<br>—    | < 1.0<br>—    |
| Ag<br>[mg L <sup>-1</sup> ]<br>Calibration limit                               | < 0.0020<br>— | < 0.0020<br>—   | < 0.0020<br>—    | < 0.0020<br>—   | < 0.0020<br>— | < 0.0020<br>— |
| V<br>[mg L <sup>-1</sup> ]<br>Calibration limit                                | < 0.0050<br>— | < 0.0050<br>—   | < 0.0050<br>—    | < 0.0050<br>—   | < 0.0050<br>— | < 0.0050<br>— |
| Se<br>[µg L <sup>-1</sup> ]<br>Calibration limit                               | < 2.0<br>—    | < 2.0<br>—      | < 2.0<br>—       | < 2.0<br>—      | 6.0<br>±0.6   | 4.4<br>±0.5   |
| Mo<br>[mg L <sup>-1</sup> ]<br>Calibration limit                               | < 0.0050<br>— | < 0.0050<br>—   | < 0.0050<br>—    | < 0.0050<br>—   | < 0.0050<br>— | < 0.0050<br>— |
| Sn<br>[mg L <sup>-1</sup> ]<br>Calibration limit                               | < 0.0050<br>— | < 0.0050<br>—   | < 0.0050<br>—    | < 0.0050<br>—   | < 0.0050<br>— | < 0.0050<br>— |
| Sb<br>[µg L <sup>-1</sup> ]<br>Calibration limit                               | < 1.0<br>—    | 1.5<br>±0.4     | < 1.0<br>—       | < 1.0<br>—      | < 1.0<br>—    | < 1.0<br>—    |
| B<br>[mg L <sup>-1</sup> ]<br>Calibration limit                                | < 0.050<br>—  | < 0.0050<br>—   | 0.11<br>±0.02    | 0.48<br>±0.05   | 0.16<br>±0.02 | 0.16<br>±0.02 |
| Ba<br>[mg L <sup>-1</sup> ]<br>Calibration limit                               | < 0.050<br>—  | 0.088<br>±0.014 | 0.077<br>±0.0012 | 0.081<br>±0.013 | < 0.050<br>—  | < 0.050<br>—  |
| Tl<br>[mg L <sup>-1</sup> ]<br>Calibration limit                               | < 0.0006<br>— | < 0.0006<br>—   | < 0.0006<br>—    | < 0.0006<br>—   | < 0.0006<br>— | < 0.0006<br>— |
| Be<br>[mg L <sup>-1</sup> ]<br>Calibration limit                               | < 0.01<br>—   | < 0.01<br>—     | < 0.01<br>—      | < 0.01<br>—     | < 0.01<br>—   | < 0.01<br>—   |
| TOC<br>[mg L <sup>-1</sup> ]<br>Calibration limit                              | 1.2<br>±0.3   | 1.6<br>±0.4     | 12.5<br>±3.2     | 1.1<br>±0.3     | 1.0<br>±0.3   | < 1.0<br>—    |
| HCO <sub>3</sub> <sup>-</sup><br>[mg L <sup>-1</sup> ]<br>Calibration limit    | 328<br>±33    | 281<br>±29      | 359<br>±36       | 489<br>±49      | 443<br>±45    | 3770<br>±377  |
| SO <sub>4</sub> <sup>2-</sup><br>[mg L <sup>-1</sup> ]<br>Calibration limit    | 72.3<br>±18.1 | 80.8<br>±16.2   | 101<br>±21       | 149<br>±30      | 224<br>±45    | 198<br>±40    |
| Cl <sup>-</sup><br>[mg L <sup>-1</sup> ]<br>Calibration limit                  | 7.36<br>±1.48 | 16.0<br>±3.2    | 26.7<br>±5.4     | 83.5<br>±16.7   | 51.6<br>±10.4 | 105<br>±21    |
| F<br>[mg L <sup>-1</sup> ]<br>Calibration limit                                | < 0.10<br>—   | < 0.10<br>—     | < 0.10<br>—      | < 0.10<br>—     | 0.10<br>±0.02 | 0.10<br>±0.02 |
| Total Hardness<br>[mg CaCO <sub>3</sub> L <sup>-1</sup> ]<br>Calibration limit | 374<br>±75    | 331<br>±67      | 515<br>±103      | 619<br>±124     | 777<br>±156   | 627<br>±126   |
| PO <sub>4</sub> <sup>3-</sup><br>[mg L <sup>-1</sup> ]<br>Calibration limit    | < 0.40<br>—   | < 0.40<br>—     | < 0.40<br>—      | < 0.40<br>—     | < 0.40<br>—   | < 0.40<br>—   |
| NH <sub>4</sub> <sup>+</sup><br>[mg L <sup>-1</sup> ]<br>Calibration limit     | 0.07<br>±0.02 | 0.07<br>±0.02   | < 0.05<br>—      | < 0.05<br>—     | 0.06<br>±0.02 | < 0.05<br>—   |
| NO <sub>3</sub> <sup>-</sup><br>[mg L <sup>-1</sup> ]<br>Calibration limit     | 22.3<br>±4.5  | 15.0<br>±3.0    | 26.4<br>±5.3     | 42.3<br>±8.5    | —             | 34.8<br>±7.0  |

|                                                            |                       |                       |       |        |        |        |
|------------------------------------------------------------|-----------------------|-----------------------|-------|--------|--------|--------|
| NO <sub>2</sub> <sup>-</sup><br>[mg L <sup>-1</sup> ]      | 0,03                  | 0,04                  | 0,03  | 0,04   | < 0,03 | < 0,03 |
| Calibration limit                                          | –                     | ±0,01                 | –     | ±0,01  | –      | –      |
| Fecal enterococci<br>in 100 ml of water<br>sample          | 42                    | 12                    | 2     | 3      | 0      | 0      |
| Calibration limit                                          | 29–61                 | 6–22                  | < 1–9 | < 1–10 | –      | –      |
| Clostridium<br>perfringens<br>in 100 ml of water<br>sample | 9                     | 68                    | 6     | 1      | 0      | 0      |
| Calibration limit                                          | 4–18                  | 51–90                 | 2–14  | < 1–8  | –      | –      |
| Coliform bacteria in<br>100 ml of the sample               | > 1,0*10 <sup>2</sup> | > 1,0*10 <sup>2</sup> | 5     | > 41   | 0      | 0      |
| Calibration limit                                          | –                     | –                     | 1–13  | –      | –      | –      |
| Escherichia coli<br>bacteria in 100 ml<br>of water         | > 1,0*10 <sup>2</sup> | 15                    | 0     | 31     | 0      | 0      |
| Calibration limit                                          | –                     | 7–32                  | –     | 19–49  | –      | –      |

**Table S2A.** Chemistry of the water from Triassic aquifer in „Przelajka – 3” in Czeladź (No 2228 in MONBADA) and in „Rozkówka R-1” in Będzin (No 2230 in MONBADA) in 2007–2015.

| Parameter<br>Year           | well „Przelajka – 3” No 2228 |                  |              |                           |      |                       |                 |                 |                 |       |       |         |        |          |                  |
|-----------------------------|------------------------------|------------------|--------------|---------------------------|------|-----------------------|-----------------|-----------------|-----------------|-------|-------|---------|--------|----------|------------------|
|                             | Date                         | Quality<br>class | Temp<br>[°C] | EC<br>μS cm <sup>-1</sup> | pH   | As                    | NH <sub>4</sub> | NO <sub>3</sub> | NO <sub>2</sub> | B     | Cl    | Cr      | Zn     | Al       | HPO <sub>4</sub> |
|                             |                              |                  |              |                           |      | [mg L <sup>-1</sup> ] |                 |                 |                 |       |       |         |        |          |                  |
| 2007/1                      | spring                       | III              | 10.2         | 1269                      | 7.11 | < 0.002               | < 0.05          | 39.6            | < 0.01          | 0.159 | 120.0 | < 0.003 | 0.8537 | 0.0018   | < 1              |
| 2007/2                      | autumn                       | III              | 10.1         | 1334                      | 7.19 | < 0.002               | < 0.05          | 40.6            | < 0.01          | 0.150 | 114.0 | < 0.003 | 0.8355 | 0.0035   | < 1              |
| 2008/1                      | 21.05.2008                   | III              | 10.5         | 1335                      | 7.10 | < 0.002               | < 0.05          | 41.9            | 0.02            | 0.156 | 128.0 | < 0.003 | 0.8440 | < 0.0005 | < 1              |
| 2008/2                      | 10.09.2008                   | III              | 10.4         | 1373                      | 7.17 | < 0.002               | < 0.05          | 40.3            | 0.01            | 0.157 | 126.0 | < 0.003 | 0.8570 | < 0.0005 | < 1              |
| 2009/1                      | 22.09.2009                   | IV               | 11.5         | 1512                      | 7.10 | < 0.002               | < 0.05          | 41.3            | 0.02            | 0.185 | 159.0 | < 0.003 | 0.9740 | 0.0022   | < 1              |
| 2010/1                      | 31.05.2010                   | III              | 10.3         | 869                       | 7.24 | < 0.002               | < 0.05          | 26.4            | 0.01            | 0.100 | 61.2  | < 0.003 | 0.6310 | 0.0009   | < 1              |
| 2011/1                      | spring                       | III              | 10.7         | 891                       | 7.26 | < 0.002               | 0.08            | 35.7            | < 0.01          | 0.080 | 49.9  | < 0.003 | 0.6430 | < 0.0005 | <0.30            |
| 2011/2                      | autumn                       | III              | 10.2         | 1014                      | 7.24 | < 0.002               | < 0.05          | 39.0            | 0.01            | 0.100 | 66.1  | 0.022   | 0.7140 | < 0.0005 | <0.30            |
| 2012/1                      |                              | III              | 10.6         | 1072                      | 7.11 | < 0.002               | < 0.05          | 39.3            | 0.03            | 0.130 | 88.9  | < 0.003 | 0.7500 | 0.0009   | <0.10            |
| 2013/1                      | spring                       | III              | 10.3         | 1079                      | 7.23 | < 0.002               | < 0.05          | 35.5            | 0.04            | 0.130 | 104.0 | < 0.003 | 0.7540 | 0.0017   | < 0.10           |
| 2013/2                      | autumn                       | III              | 10.6         | 1027                      | 7.15 | < 0.002               | < 0.05          | 34.9            | 0.06            | 0.120 | 80.4  | < 0.003 | 0.7750 | 0.0007   | < 0.10           |
| 2014/1                      | spring                       | III              | 10.4         | 1082                      | 7.18 | < 0.002               | < 0.05          | 38.7            | < 0.01          | 0.130 | 80.2  | < 0.003 | 0.7830 | < 0.0005 | < 0.10           |
| 2014/2                      | autumn                       | III              | 11.0         | 1126                      | 7.24 | < 0.002               | < 0.05          | 38.2            | 0.01            | 0.150 | 106.0 | < 0.003 | 0.7630 | < 0.0005 | < 0.10           |
| 2015/1                      | autumn                       | III              | 10.7         | 1238                      | 7.31 | < 0.002               | < 0.05          | 34.9            | < 0.01          | 0.146 | 99.9  | < 0.003 | 0.8117 | < 0.0005 | < 0.30           |
| well „Rozkówka R-1” No 2230 |                              |                  |              |                           |      |                       |                 |                 |                 |       |       |         |        |          |                  |
| 2007/1                      | spring                       | IV               | 10.5         | 1222                      | 7.14 | < 0.002               | < 0.05          | 60.9            | < 0.01          | 0.239 | 63.1  | < 0.003 | 0.4457 | 0.0027   | < 1              |
| 2007/2                      | autumn                       | IV               | 10.6         | 1307                      | 7.23 | < 0.002               | < 0.05          | 59.2            | < 0.01          | 0.246 | 61.9  | < 0.003 | 0.4549 | 0.0042   | < 1              |
| 2008/1                      | 21.05.2008                   | IV               | 10.4         | 1275                      | 7.08 | < 0.002               | < 0.05          | 57.3            | < 0.01          | 0.221 | 67.9  | < 0.003 | 0.4735 | < 0.0005 | < 1              |
| 2008/2                      | 10.09.2008                   | IV               | 12.5         | 1278                      | 7.19 | < 0.002               | < 0.05          | 58.4            | < 0.01          | 0.221 | 59.6  | < 0.003 | 0.4787 | < 0.0005 | < 1              |
| 2009/1                      | 19.10.2009                   | IV               | 12.4         | 1332                      | 7.09 | < 0.002               | < 0.05          | 62.8            | < 0.01          | 0.255 | 69.0  | < 0.003 | 0.5151 | 0.0038   | < 1              |
| 2010/1                      | 31.05.2010                   | IV               | 9.9          | 1204                      | 7.10 | < 0.002               | < 0.05          | 61.6            | 0.02            | 0.200 | 73.4  | < 0.003 | 0.4860 | < 0.0005 | < 1              |
| 2011/1                      | spring                       | IV               | 10.5         | 1142                      | 7.18 | < 0.002               | < 0.05          | 57.6            | < 0.01          | 0.270 | 59.7  | < 0.003 | 0.4750 | < 0.0005 | < 0.30           |
| 2011/2                      | autumn                       | IV               | 10.5         | 1148                      | 7.19 | < 0.002               | < 0.05          | 57.9            | 0.02            | 0.240 | 50.7  | < 0.003 | 0.4740 | < 0.0005 | < 0.30           |
| 2012/1                      |                              | IV               | 11.7         | 1142                      | 7.12 | < 0.002               | < 0.05          | 56.9            | < 0.01          | 0.240 | 60.7  | < 0.003 | 0.4641 | 0.0008   | <0.10            |
| 2013/1                      | spring                       | IV               | 10.6         | 1129                      | 7.17 | < 0.002               | < 0.05          | 53.3            | 0.04            | 0.220 | 65.3  | < 0.003 | 0.4700 | 0.0021   | < 0.10           |
| 2013/2                      | autumn                       | IV               | 10.3         | 1011                      | 7.14 | < 0.002               | < 0.05          | 54.5            | 0.08            | 0.240 | 61.2  | < 0.003 | 0.4670 | < 0.0005 | < 0.10           |
| 2014/1                      | spring                       | IV               | 10.4         | 1118                      | 7.20 | < 0.002               | < 0.05          | 52.2            | < 0.01          | 0.210 | 53.0  | < 0.003 | 0.4750 | 0.0008   | < 0.10           |
| 2014/2                      | autumn                       | IV               | 10.6         | 1100                      | 7.21 | < 0.002               | < 0.05          | 50.2            | < 0.01          | 0.190 | 54.0  | < 0.003 | 0.4720 | 0.0008   | < 0.10           |
| 2015/1                      | autumn                       | III              | 10.6         | 1199                      | 7.20 | < 0.002               | < 0.05          | 49.8            | < 0.01          | 0.177 | 52.6  | < 0.003 | 0.5066 | 0.0008   | < 0.30           |

The chemical analysis were carried out in the certified Laboratory of the Polish Geological Institute - National Research Institute in Warsaw as part of the National MONBADA monitoring. The analysis were usually performed twice a year.

**Table S2B:** Chemistry of the water from Triassic aquifer in „Przelajka – 3” in Czeladź (No 2228 in MONBADA) and in „Rozkówka R-1” in Będzin (No 2230 in MONBADA) in 2007–2015.

| well „Przelajka – 3” No 2228 |            |                       |                  |       |           |          |           |           |      |                 |       |          |        |                  |        |
|------------------------------|------------|-----------------------|------------------|-------|-----------|----------|-----------|-----------|------|-----------------|-------|----------|--------|------------------|--------|
| Parameter<br>Year            | Date       | Cd                    | SiO <sub>2</sub> | Mg    | Mn        | Cu       | Ni        | Pb        | K    | SO <sub>4</sub> | Na    | Hg       | Ca     | HCO <sub>3</sub> | Fe     |
|                              |            | [mg L <sup>-1</sup> ] |                  |       |           |          |           |           |      |                 |       |          |        |                  |        |
| 2007/1                       | spring     | 0.00103               | 11.78            | 53.82 | < 0.00100 | 0.00124  | < 0.0010  | 0.00006   | 4.73 | 235             | 72.22 | < 0.0003 | 138.12 | 330.6            | < 0.01 |
| 2007/2                       | autumn     | 0.00106               | 12.12            | 55.48 | 0.00100   | 0.00170  | < 0.0010  | 0.00006   | 4.60 | 232             | 73.75 | < 0.0003 | 133.86 | 341.6            | < 0.01 |
| 2008/1                       | 21.05.2008 | 0.001080              | n.d.             | 56.87 | 0.00357   | 0.00186  | < 0.0010  | 0.00006   | 4.41 | 241             | 75.45 | < 0.0003 | 140.41 | 336.7            | < 0.01 |
| 2008/2                       | 10.09.2008 | 0.001030              | n.d.             | 56.76 | < 0.00100 | 0.00128  | 0.0005    | 0.00005   | 4.89 | 239             | 82.65 | < 0.0003 | 133.88 | 330.6            | < 0.01 |
| 2009/1                       | 22.09.2009 | 0.00122               | n.d.             | 56.51 | < 0.00100 | 0.00307  | < 0.0050  | 0.00012   | 5.57 | 267             | 94.50 | < 0.0003 | 154.86 | 373.3            | < 0.01 |
| 2010/1                       | 31.05.2010 | 0.000650              | n.d.             | 35.30 | < 0.00100 | 0.00348  | < 0.0050  | < 0.00005 | 4.40 | 185             | 40.50 | < 0.0003 | 110.90 | 285.0            | < 0.01 |
| 2011/1                       | spring     | 0.000850              | n.d.             | 49.10 | < 0.00100 | 0.00186  | 0.0021    | 0.00006   | 2.70 | 177             | 25.90 | < 0.0003 | 112.4  | 323.0            | < 0.01 |
| 2011/2                       | autumn     | 0.001010              | n.d.             | 50.50 | < 0.00100 | 0.00133  | 0.0011    | 0.00010   | 3.70 | 198             | 41.50 | < 0.0003 | 120.7  | 348.0            | < 0.01 |
| 2012/1                       |            | 0.001025              | n.d.             | 51.70 | < 0.00100 | 0.001675 | < 0.0005  | 0.000065  | 3.90 | 213             | 54.30 | < 0.0003 | 127.6  | 341.6            | < 0.01 |
| 2013/1                       | spring     | 0.001010              | n.d.             | 50.70 | < 0.00100 | 0.002010 | 0.0210    | < 0.00005 | 4.20 | 204             | 62.10 | < 0.0003 | 123.7  | 333.0            | < 0.01 |
| 2013/2                       | autumn     | 0.001080              | n.d.             | 50.00 | < 0.00100 | 0.001680 | < 0.0005  | < 0.00005 | 3.90 | 193             | 48.00 | < 0.0003 | 114.9  | 337.0            | < 0.01 |
| 2014/1                       | spring     | < 0.00005             | n.d.             | 53.50 | < 0.00100 | 0.00135  | < 0.0005  | < 0.00005 | 4.10 | 214             | 58.70 | < 0.0003 | 131.0  | 328.2            | 0.02   |
| 2014/2                       | autumn     | < 0.00005             | n.d.             | 51.50 | < 0.00100 | 0.00148  | < 0.0005  | < 0.00005 | 4.10 | 230             | 66.20 | < 0.0003 | 126.4  | 347.7            | 0.02   |
| 2015/1                       | autumn     | 0.000870              | n.d.             | 54.90 | < 0.00100 | 0.00117  | < 0.0005  | < 0.00005 | 4.10 | 228             | 67.30 | < 0.0003 | 128.0  | 350.0            | 0.01   |
| well „Rozkówka R-1” No 2230  |            |                       |                  |       |           |          |           |           |      |                 |       |          |        |                  |        |
| 2007/1                       | spring     | 0.00092               | 11.47            | 65.85 | < 0.00100 | 0.00179  | < 0.0010  | 0.00047   | 8.92 | 256             | 40.83 | < 0.0003 | 147.52 | 373.3            | < 0.01 |
| 2007/2                       | autumn     | 0.00096               | 12.28            | 67.92 | 0.00130   | 0.00251  | < 0.0010  | 0.00047   | 9.47 | 259             | 40.11 | < 0.0003 | 146.16 | 390.4            | 0.0348 |
| 2008/1                       | 21.05.2008 | 0.000900              | n.d.             | 69.94 | < 0.00100 | 0.00366  | < 0.0010  | 0.00261   | 8.92 | 264             | 37.80 | < 0.0003 | 149.04 | 384.3            | < 0.01 |
| 2008/2                       | 10.09.2008 | 0.000940              | n.d.             | 69.24 | < 0.00100 | 0.00365  | 0.0005    | 0.00253   | 8.85 | 262             | 37.90 | < 0.0003 | 145.99 | 388.0            | < 0.01 |
| 2009/1                       | 19.10.2009 | 0.000973              | n.d.             | 66.21 | < 0.00100 | 0.003818 | < 0.0050  | 0.00118   | 9.18 | 261             | 46.67 | < 0.0003 | 151.28 | 418.4            | 0.0192 |
| 2010/1                       | 31.05.2010 | 0.001000              | n.d.             | 67.10 | < 0.00100 | 0.00343  | < 0.0050  | 0.00178   | 7.50 | 258             | 50.60 | < 0.0003 | 141.00 | 416.0            | 0.14   |
| 2011/1                       | spring     | 0.000990              | n.d.             | 69.70 | < 0.00100 | 0.00160  | 0.0018    | 0.00047   | 8.20 | 254             | 35.70 | < 0.0003 | 136.60 | 414.0            | 0.09   |
| 2011/2                       | autumn     | 0.000950              | n.d.             | 69.40 | < 0.00100 | 0.00151  | 0.0008    | 0.00047   | 8.50 | 248             | 36.0  | < 0.0003 | 139.20 | 426.0            | 0.07   |
| 2012/1                       |            | 0.000891              | n.d.             | 67.80 | < 0.00100 | 0.001908 | < 0.0050  | 0.000419  | 8.50 | 256             | 34.5  | < 0.0003 | 146.30 | 422.1            | 0.05   |
| 2013/1                       | spring     | 0.000950              | n.d.             | 68.40 | < 0.00100 | 0.00200  | 0.0019    | 0.00046   | 8.80 | 259             | 34.9  | < 0.0003 | 142.4  | 410.0            | 0.01   |
| 2013/2                       | autumn     | 0.001000              | n.d.             | 66.20 | < 0.00100 | 0.00179  | < 0.00050 | 0.00041   | 8.00 | 242             | 36.5  | < 0.0003 | 132.4  | 410.0            | 0.06   |
| 2014/1                       | spring     | 0.000960              | n.d.             | 72.20 | < 0.00100 | 0.00160  | < 0.0005  | 0.00054   | 9.40 | 246             | 34.4  | < 0.0003 | 147.9  | 407.5            | 0.04   |
| 2014/2                       | autumn     | 0.001040              | n.d.             | 66.90 | < 0.00100 | 0.00149  | < 0.0005  | 0.00097   | 9.30 | 258             | 32.3  | < 0.0003 | 136.8  | 398.9            | 0.02   |
| 2015/1                       | autumn     | 0.001000              | n.d.             | 69.70 | 0.00126   | 0.00156  | < 0.0005  | 0.00104   | 8.40 | 253             | 32.1  | < 0.0003 | 136.7  | 410.0            | 0.0142 |

The chemical analysis were carried out in the certified Laboratory of the Polish Geological Institute - National Research Institute in Warsaw as part of the National MONBADA monitoring. The analysis were usually performed twice a year.

Explanations: n.d. – not detected

**Table S3:** Water chemistry of springs of the Triassic aquifer in Wojkowice and the surrounding area (2015.11.06–2019.03.11).

| Number of spring | Table location Date     | Temperature of water | pH   | EC                     | TH                                      | Ca                    | Mg   | Na   | K     | HCO <sub>3</sub> | SO <sub>4</sub> | Cl   | NO <sub>3</sub> | PO <sub>4</sub> | SiO <sub>2</sub> | Charge balance error |
|------------------|-------------------------|----------------------|------|------------------------|-----------------------------------------|-----------------------|------|------|-------|------------------|-----------------|------|-----------------|-----------------|------------------|----------------------|
|                  |                         | [°C]                 | [-]  | [μS cm <sup>-1</sup> ] | [mg CaCO <sub>3</sub> L <sup>-1</sup> ] | [mg L <sup>-1</sup> ] |      |      |       |                  |                 |      |                 |                 |                  | [%]                  |
| 1.               | „Stara 107” spring      |                      |      |                        |                                         |                       |      |      |       |                  |                 |      |                 |                 |                  |                      |
|                  | 2016.03.12              | 6.4                  | 8.17 | 685.0                  | 375                                     | 110.0                 | 24.3 | 4.20 | 0.70  | 330              | 80.1            | 9.8  | 25.2            | 0.07            | 4.40             | -0.3                 |
|                  | 2017.10.06              | 10.6                 | 8.16 | 589.0                  | 335                                     | 95.0                  | 27.6 | 4.30 | 0.70  | 313              | 61.3            | 8.3  | 31.0            | 0.10            | n.t.             | 0.7                  |
|                  | 2019.03.11              | 6.7                  | 8.11 | 757.0                  | 373                                     | 114.0                 | 21.4 | 5.00 | 0.52  | 317              | 68.4            | 8.2  | 23.5            | 0.10            | 5.30             | 3.0                  |
| 2.               | „U Wnuka” spring        |                      |      |                        |                                         |                       |      |      |       |                  |                 |      |                 |                 |                  |                      |
|                  | 2018.03.21              | 5.1                  | 7.93 | 801.0                  | 365                                     | 118.0                 | 17.2 | 5.70 | 1.00  | 290              | 91.1            | 13.0 | 16.2            | 0.07            | n.t.             | -3.6                 |
|                  | 2018.10.27              | 7.4                  | 7.97 | 611.0                  | 373                                     | 89.0                  | 36.0 | 7.74 | 1.21  | 278              | 88.3            | 20.5 | 16.8            | 0.05            | 4.02             | 3.8                  |
|                  | 2019.03.11              | 8.2                  | 7.74 | 771.0                  | 348                                     | 100.0                 | 23.4 | 9.55 | 1.43  | 270              | 78.3            | 25.0 | 22.2            | 0.04            | 4.76             | -2.0                 |
| 3.               | „Brzeziny” spring       |                      |      |                        |                                         |                       |      |      |       |                  |                 |      |                 |                 |                  |                      |
|                  | 2017.10.06              | 10.4                 | 7.29 | 877.0                  | 500                                     | 130.0                 | 42.0 | 89.8 | 10.50 | 412              | 122.6           | 47.0 | 43.9            | 0.02            | n.t.             | 2.8                  |
|                  | 2018.03.21              | 6.5                  | 7.37 | 975.0                  | 450                                     | 114.0                 | 39.6 | 14.5 | 1.70  | 384              | 116.6           | 32.0 | 26.6            | 0.06            | n.t.             | -2.0                 |
|                  | 2018.10.27              | 9.4                  | 7.10 | 1007.0                 | 523                                     | 146.0                 | 37.8 | 28.1 | 3.44  | 442              | 116.5           | 56.0 | 36.3            | 0.06            | 7.10             | -94.0                |
|                  | 2019.03.11              | 8.5                  | 7.30 | 1061.0                 | 494                                     | 137.0                 | 26.8 | 20.8 | 2.52  | 363              | 92.9            | 39.0 | 35.4            | 0.08            | 7.10             | -1.8                 |
| 4.               | „Pod Morwą” spring      |                      |      |                        |                                         |                       |      |      |       |                  |                 |      |                 |                 |                  |                      |
|                  | 2017.10.06              | 10.5                 | 8.14 | 898.0                  | 500                                     | 124.0                 | 45.6 | 25.2 | 2.60  | 409              | 141.5           | 51.0 | 53.2            | 0.06            | n.t.             | -3.4                 |
|                  | 2018.03.21              | 5.6                  | 7.83 | 1117.0                 | 455                                     | 116.0                 | 39.6 | 23.9 | 2.20  | 391              | 122.4           | 40.0 | 38.1            | 0.07            | n.t.             | -2.4                 |
|                  | 2018.10.27              | 9.7                  | 8.05 | 946.0                  | 446                                     | 122.0                 | 34.2 | 28.5 | 3.12  | 375              | 140.0           | 50.0 | 46.5            | 0.06            | 6.40             | -4.6                 |
|                  | 2019.03.11              | 7.0                  | 7.90 | 1092.0                 | 436                                     | 123.0                 | 31.4 | 26.2 | 2.52  | 360              | 115.8           | 42.5 | 44.3            | 0.09            | 7.05             | -1.4                 |
| 5.               | „Długosza 36” spring    |                      |      |                        |                                         |                       |      |      |       |                  |                 |      |                 |                 |                  |                      |
|                  | 2015.11.06              | 10.0                 | 6.88 | 1403.0                 | 635                                     | 174.0                 | 48.0 | 42.8 | 5.00  | 488              | 176.0           | 73.0 | 51.0            | 0.04            | 9.10             | 0.5                  |
|                  | 2017.10.06              | 10.3                 | 6.95 | 1201.0                 | 650                                     | 182.0                 | 46.8 | 39.1 | 4.50  | 516              | 171.1           | 77.0 | 73.1            | 0.05            | n.t.             | -1.8                 |
|                  | 2018.03.21              | 9.3                  | 6.94 | 1581.0                 | 650                                     | 172.0                 | 52.8 | 35.6 | 4.00  | 529              | 146.3           | 86.0 | 55.8            | 0.05            | n.t.             | -1.6                 |
|                  | 2018.10.27              | 9.0                  | 6.84 | 1291.0                 | 635                                     | 177.0                 | 46.2 | 46.3 | 5.80  | 497              | 201.0           | 88.0 | 46.5            | 0.05            | 7.70             | -2.3                 |
|                  | 2019.03.11              | 9.4                  | 6.74 | 1451.0                 | 628                                     | 182.0                 | 42.0 | 37.2 | 4.52  | 439              | 147.2           | 78.0 | 54.1            | 0.06            | 6.90             | 3.4                  |
| 8.               | „U Piekarskiego” spring |                      |      |                        |                                         |                       |      |      |       |                  |                 |      |                 |                 |                  |                      |
|                  | 2015.11.06              | 10.3                 | 8.19 | 727.0                  | 365                                     | 116.0                 | 18.0 | 8.3  | 2.70  | 323              | 91.2            | 19.5 | 29.2            | 0.02            | 6.3              | -3.1                 |
|                  | 2017.10.06              | 10.2                 | 7.28 | 755.0                  | 400                                     | 106.0                 | 32.4 | 8.1  | 1.40  | 338              | 104.7           | 23.0 | 39.9            | 0.08            | n.t.             | -3.8                 |
|                  | 2018.03.21              | 9.7                  | 7.40 | 888.0                  | 375                                     | 108.0                 | 25.2 | 7.5  | 1.30  | 305              | 102.6           | 21.5 | 26.6            | 0.05            | n.t.             | -2.0                 |
|                  | 2018.10.27              | 9.2                  | 7.45 | 688.0                  | 395                                     | 105.0                 | 31.8 | 8.1  | 1.50  | 296              | 94.2            | 24.0 | 26.1            | 0.05            | 4.74             | -2.3                 |
|                  | 2019.03.11              | 10.1                 | 7.41 | 848.0                  | 365                                     | 111.0                 | 21.0 | 12.3 | 2.26  | 287              | 91.8            | 28.5 | 35.4            | 0.09            | 5.54             | -0.6                 |
| 9.               | Psary spring            |                      |      |                        |                                         |                       |      |      |       |                  |                 |      |                 |                 |                  |                      |
|                  | 2015.11.06              | 9.6                  | 7.15 | 548.0                  | 260                                     | 84.0                  | 12.0 | 3.4  | 2.50  | 128              | 95.6            | 20.0 | 36.3            | 0.06            | 9.80             | 1.6                  |
|                  | 2017.10.06              | 9.6                  | 6.73 | 494.0                  | 245                                     | 78.0                  | 12.0 | 3.6  | 1.80  | 113              | 103.3           | 22.0 | 48.7            | 0.10            | n.t.             | -2.9                 |
|                  | 2018.03.21              | 8.9                  | 6.92 | 630.0                  | 240                                     | 68.0                  | 16.8 | 3.5  | 1.60  | 128              | 101.2           | 17.0 | 38.3            | 0.11            | n.t.             | -3.0                 |

|     |                                      |      |      |        |     |       |      |      |      |     |       |      |      |      |      |      |
|-----|--------------------------------------|------|------|--------|-----|-------|------|------|------|-----|-------|------|------|------|------|------|
|     | 2018.10.27                           | 9.1  | 7.10 | 493.0  | 245 | 77.0  | 12.6 | 4.3  | 1.80 | 121 | 98.9  | 19.5 | 45.2 | 0.06 | 8.35 | -1.7 |
|     | 2019.03.11                           | 9.5  | 6.86 | 577.0  | 234 | 76.0  | 10.6 | 4.4  | 1.67 | 116 | 101.5 | 18.0 | 52.3 | 0.08 | 9.75 | -4.6 |
| 10. | Strzemieszyce spring                 |      |      |        |     |       |      |      |      |     |       |      |      |      |      |      |
|     | 2015.11.06                           | 9.8  | 7.11 | 923.0  | 390 | 106.0 | 30.0 | 20.0 | 3.30 | 336 | 91.2  | 45.0 | 38.1 | 0.04 | 6.90 | -2.9 |
|     | 2016.03.12                           | 9.0  | 7.33 | 865.0  | 427 | 115.0 | 34.0 | 16.8 | 1.70 | 360 | 118.0 | 46.0 | 26.6 | 0.06 | 5.60 | -1.3 |
| 11. | Dąbrowa Górnicza - Zakawie spring    |      |      |        |     |       |      |      |      |     |       |      |      |      |      |      |
|     | 2015.11.06                           | 8.7  | 7.94 | 579.0  | 304 | 66.2  | 33.6 | 7.8  | 0.90 | 290 | 64.5  | 13.9 | 10.7 | 0.01 | 3.40 | 1.7  |
|     | 2016.03.12                           | 7.8  | 7.55 | 635.0  | 332 | 82.0  | 31.0 | 17.4 | 2.80 | 317 | 76.6  | 18.0 | 15.1 | 0.05 | 3.60 | -0.5 |
| 12. | Góra Siewierska spring               |      |      |        |     |       |      |      |      |     |       |      |      |      |      |      |
|     | 2015.11.06                           | 9.1  | 7.79 | 734.0  | 335 | 108.0 | 15.6 | 7.8  | 1.10 | 299 | 75.2  | 21.0 | 38.9 | 0.03 | 5.90 | -4.3 |
|     | 2016.03.12                           | 8.5  | 7.69 | 690.0  | 338 | 106.0 | 19.5 | 6.7  | 0.90 | 299 | 74.9  | 21.0 | 34.6 | 0.08 | 4.70 | -3.7 |
|     | 2017.10.06                           | 9.0  | 7.45 | 643.0  | 360 | 108.0 | 21.6 | 6.1  | 0.70 | 311 | 86.6  | 23.0 | 44.3 | 0.07 | n.t. | -5.0 |
|     | 2018.03.18                           | 8.6  | 7.52 | 851.0  | 350 | 116.0 | 14.4 | 6.4  | 0.70 | 308 | 79.0  | 18.0 | 33.7 | 0.04 | n.t. | -3.0 |
|     | 2018.10.27                           | 8.4  | 7.79 | 687.0  | 367 | 122.0 | 15.2 | 7.8  | 0.80 | 297 | 78.9  | 21.5 | 38.1 | 0.08 | 4.72 | 0.2  |
|     | 2019.03.11                           | 9.2  | 7.46 | 774.0  | 333 | 109.0 | 14.4 | 7.7  | 0.75 | 290 | 71.9  | 23.0 | 40.8 | 0.08 | 4.98 | 3.8  |
| 13. | Rogoźnik „Pod Górą Buczynową” spring |      |      |        |     |       |      |      |      |     |       |      |      |      |      |      |
|     | 2015.11.06                           | 9.1  | 7.35 | 748.0  | 360 | 108.0 | 21.6 | 8.8  | 1.10 | 305 | 80.0  | 29.0 | 24.4 | 0.04 | 6.40 | -1.7 |
|     | 2016.03.12                           | 8.8  | 7.34 | 654.0  | 360 | 106.0 | 23.1 | 7.9  | 0.90 | 293 | 77.0  | 31.5 | 18.2 | 0.06 | 5.20 | -0.1 |
|     | 2017.10.06                           | 8.9  | 7.33 | 668.0  | 365 | 106.0 | 24.0 | 7.2  | 0.70 | 314 | 78.2  | 31.5 | 28.4 | 0.09 | n.t. | -3.1 |
|     | 2018.03.18                           | 8.8  | 7.46 | 820.0  | 370 | 110.0 | 22.8 | 6.5  | 0.60 | 299 | 85.5  | 25.0 | 21.3 | 0.08 | n.t. | -0.2 |
|     | 2018.10.27                           | 7.9  | 7.48 | 691.0  | 353 | 117.0 | 14.4 | 9.0  | 0.80 | 311 | 86.3  | 30.0 | 24.8 | 0.10 | 4.38 | -4.4 |
|     | 2019.03.11                           | 9.3  | 7.43 | 793.0  | 335 | 108.0 | 15.6 | 8.6  | 0.80 | 278 | 82.5  | 31.0 | 24.6 | 0.10 | 6.44 | 3.1  |
| 14. | Będzin „Na Kamionce” spring          |      |      |        |     |       |      |      |      |     |       |      |      |      |      |      |
|     | 2015.11.06                           | 10.0 | 8.06 | 585.0  | 285 | 80.0  | 20.8 | 2.4  | 1.00 | 244 | 81.4  | 5.3  | 5.8  | 0.03 | 5.80 | -0.8 |
|     | 2016.03.12                           | 6.5  | 7.58 | 604.0  | 310 | 74.0  | 31.0 | 2.2  | 0.70 | 260 | 77.5  | 6.0  | 4.6  | 0.06 | 4.70 | 2.8  |
| 15. | Strzemieszyce „Majewskiego” spring   |      |      |        |     |       |      |      |      |     |       |      |      |      |      |      |
|     | 2016.03.12                           | 7.1  | 7.12 | 1020.0 | 590 | 172.0 | 37.1 | 4.9  | 0.70 | 497 | 148.0 | 17.5 | 18.6 | 0.05 | 5.90 | 0.0  |

Explanations: n.t. – not tested
